# Supplementary material for: Aggression and courtship differences found in Drosophila melanogaster from two different microclimates at Evolution Canyon, Israel
Source: PubMed Central journal article supplement (PMC6411990; doi:10.1038/s41598-019-40701-8), 2019-03-11
Supplement: 41598_2019_40701_MOESM1_ESM.pdf [file 41598_2019_40701_MOESM1_ESM.pdf]

**Aggression and courtship differences found in *Drosophila melanogaster*  
from two different microclimates at Evolution Canyon, Israel**

Caroline B. Palavicino-Maggio<sup>1</sup>, Séverine Trannoy<sup>1,2</sup>, Kristina M. Holton<sup>3</sup>, Xiaoying  
Song<sup>4,6</sup>, Kexin Li<sup>4,5</sup> and Eviatar Nevo<sup>4</sup>

## Supplementary Information:

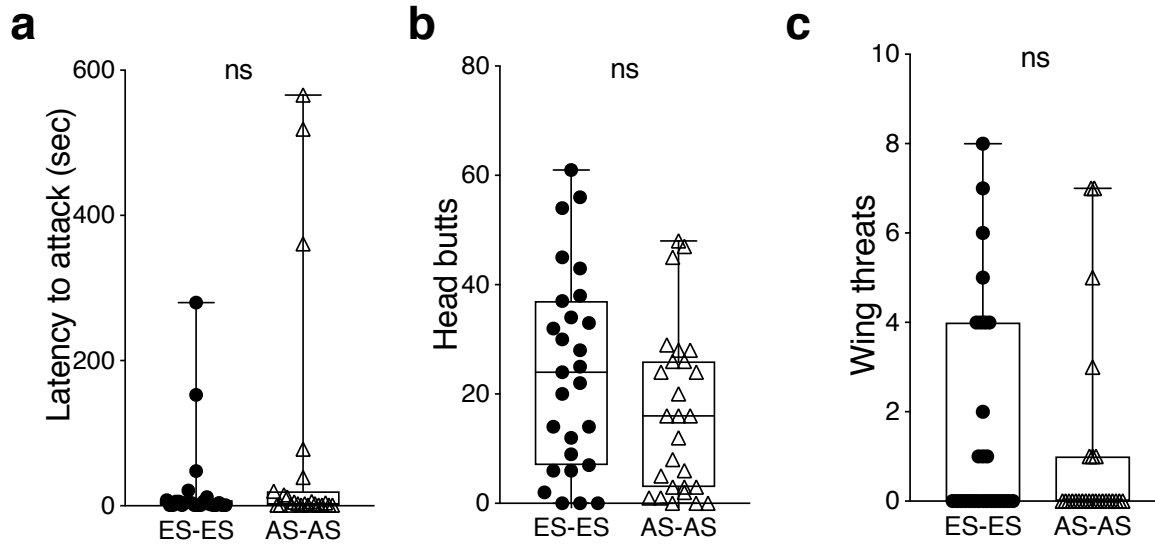**Supplementary Figure 1. Intraslope fight characterization between ES and AS**

**females.** (a) The latency to attack, (b) total number of head butts, and (c) the total number of wing threats were not significantly different within ES and AS female pairings.  $n=27$  pairs. (a-c) Center line, median; boxes, first and third quartiles; whiskers, range of values; circle or triangle, individual values. Individual value points on panel (a) represent the latency of a single fly (evaluated by Mann Whitney U-test) and value points on panels (b-c) represent the counts for the number of lunges and wing threats from pairs (evaluated by Mann Whitney U-test); \* $p<0.05$ ; ns, non-significant.

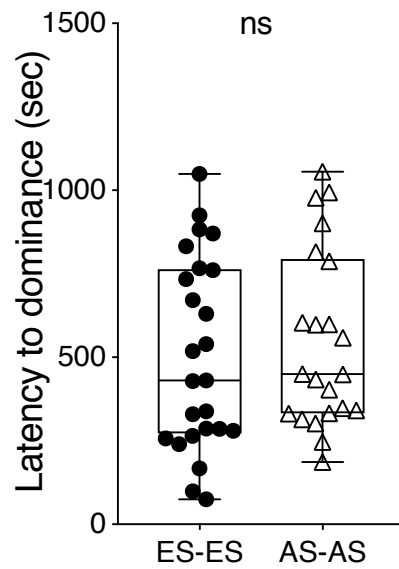

**Supplementary Figure 2. The latency to dominance was not different between ES and AS pairs of male fights.** n=38-42. Center line, median; boxes, first and third quartiles; whiskers, range of values; circle or triangle, individual values. Statistical significance was evaluated by Mann-Whitney U-tests; ns, non-significant.

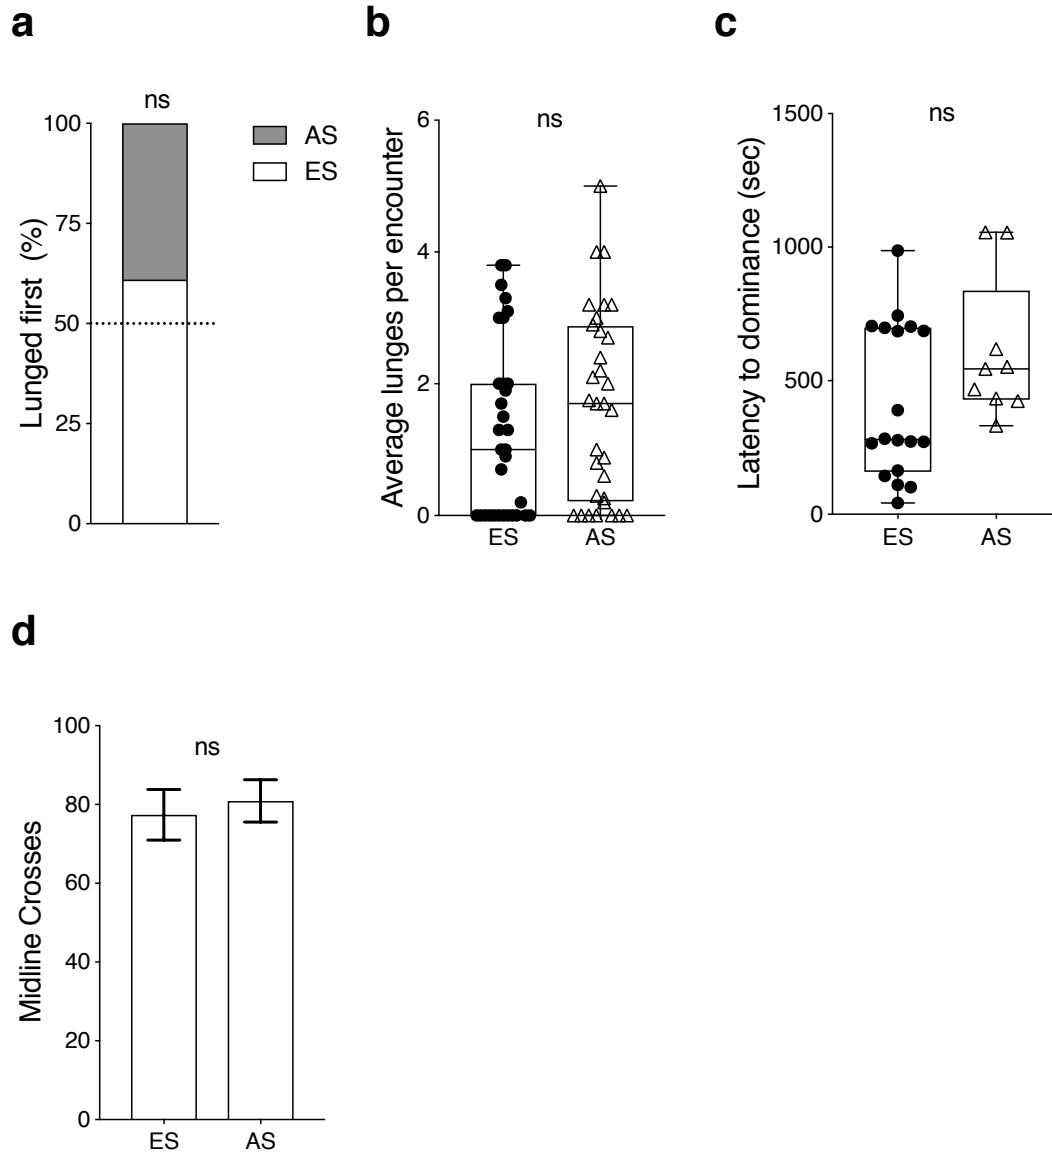

**Supplementary Figure 3. Interslope male fights ES vs. AS.** (a) The percentage of males that lunged first (evaluated by Chi-square tests), (b) average number of lunges per aggressive encounter, and (c) latency to dominance were not different (evaluated by Mann-Whitney U-tests).  $n=38$  single flies. ns, non-significant. (b-c) Center line, median; boxes, first and third quartiles; whiskers, range; circle or triangle, individual values. (d) ES and AS males have the same levels of locomotion (evaluated by Mann-Whitney U-tests).  $n=19$  single flies. ns, non-significant. Data are represented as means  $\pm$  SEM.

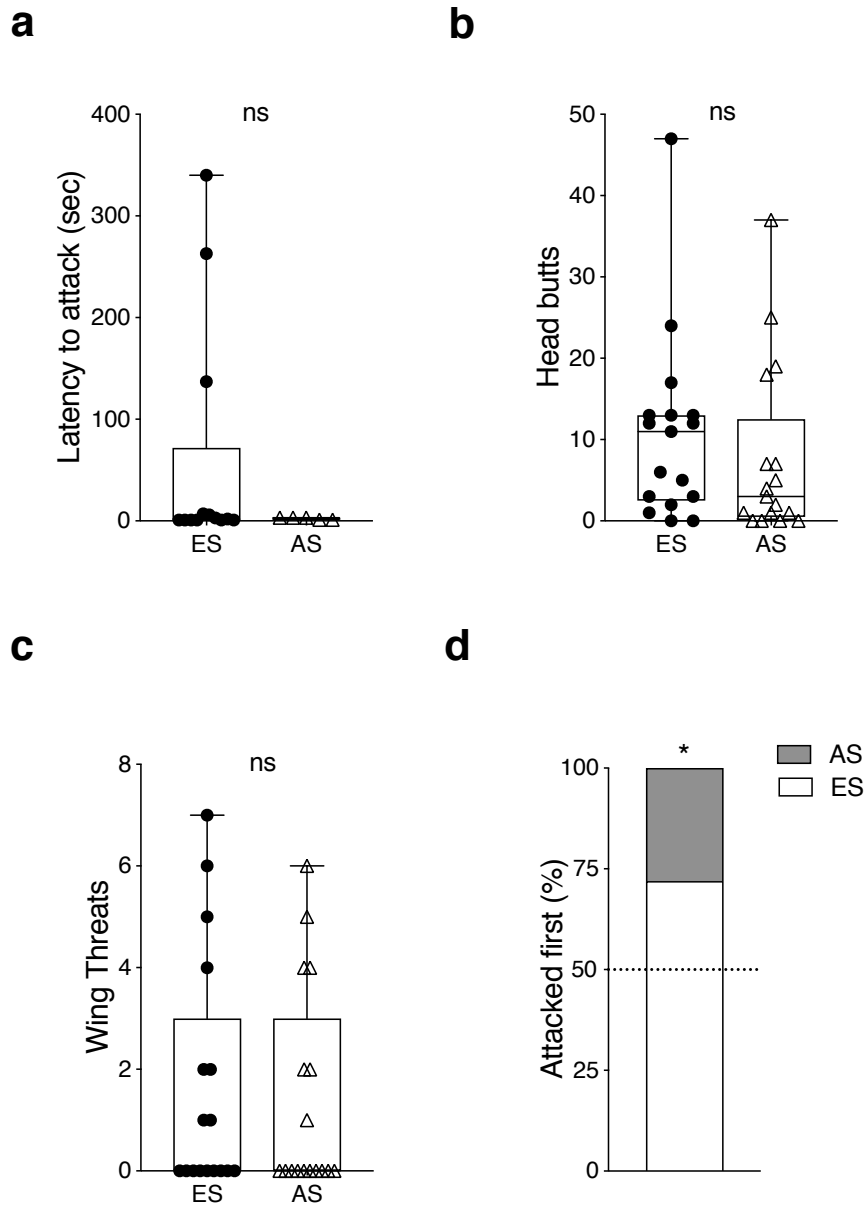

**Supplementary Figure 4. Interslope female fights ES vs. AS.** (a) The latency to attack (evaluated by Mann-Whitney U-test), (b) total number of head butts, and (c) total number of wing threats were not different (evaluated by paired sample Wilcoxon matched-pairs signed-rank tests). However, (d) there were many more ES females that attacked first (evaluated by Chi-square test).  $n=18$  single flies.  $*p<0.05$ , ns, non-significant. (a-c) Center line, median; boxes, first and third quartiles; whiskers, range; circle or triangle, individual values.

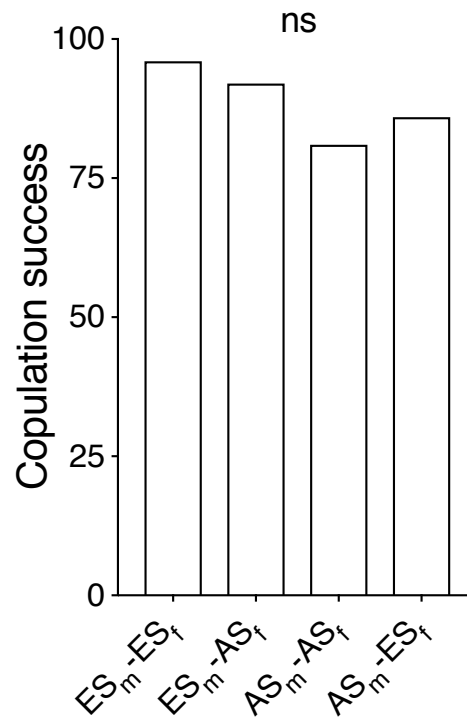

**Supplementary Figure 5. The percentages of copulation success from male-female courtship pairings from ES and AS populations.  $n=27-29$ . Statistical significance evaluated by Chi-square test, ns, non-significant.**
